# Supplementary material for: Constructing hierarchical porous nanospheres for versatile microwave response approaches: the effect of architectural design
Source: Royal Society of Chemistry journal article supplement (doi:10.1039/c7dt03207b), 2017-01-01
Supplement: c7dt03207b1.pdf [file c7dt03207b1.pdf]

Supporting Information

**Constructing hierarchical porous nanospheres for versatile  
microwave response approaches: the effect of architectural  
design**

*Bin Quan<sup>a</sup>, Xiaohui Liang<sup>a</sup>, Heng Yi<sup>a</sup>, He Gong<sup>a</sup>, Guangbin Ji<sup>\*a</sup>, Jiabin Chen<sup>a</sup>,*

*Guoyue Xu<sup>a</sup>, Youwei Du<sup>b</sup>*

*<sup>a</sup>College of Materials Science and Technology, Nanjing University of Aeronautics and  
Astronautics, Nanjing 211100, P. R. China.*

*<sup>b</sup>Laboratory of Solid State Microstructures, Nanjing University, Nanjing 210093, P. R.  
China.*

\*Corresponding Author:

Prof. Dr. Guangbin Ji.

Tel: +86-25-52112902; Fax: +86-25-52112626

E-mail: [gbi@nuaa.edu.cn](mailto:gbi@nuaa.edu.cn)

## 1. Experimental Section

### ***Preparation of rGO***

Briefly, 10 mL GO solution was added to a mixture of ethanol (15 mL) and distilled water (45 mL) for ultrasonic treatment of 2 h. The obtained solution was transferred into a Teflon-lined autoclave at 150 °C for 10 h and cooled to room temperature. Finally, the product was separated by centrifugation, washed alternately for three times with distilled water and ethyl alcohol, and dried at 60 °C for 24 h under vacuum. The basic characterization of XRD and TEM are presented in Figure S1.

### ***Preparation of porous Fe<sub>3</sub>O<sub>4</sub> nanospheres***

Porous Fe<sub>3</sub>O<sub>4</sub> nanospheres were also prepared according to the synthesis procedures of Fe<sub>3</sub>O<sub>4</sub>-C nanospheres without the addition of acrylic acid. The porous Fe<sub>3</sub>O<sub>4</sub> nanospheres were denoted as Is.

### ***Preparation of carbon nanospheres***

Carbon nanospheres were prepared via a typical method. Briefly, 7.92 g glucose was dissolved in 80 mL of deionized water under 5 min of ultrasonic treatment. Then, the obtained solution was transferred into a 100 mL Teflon-lined stainless steel autoclave at 180 °C for 5 h. In order to get graphitized carbon spheres, the precursor was treated in argon atmosphere at 550 °C for 5 h with a heating rate of 1 °C /min. The carbon nanospheres were denoted as Cs.

## 2. Results and discussion

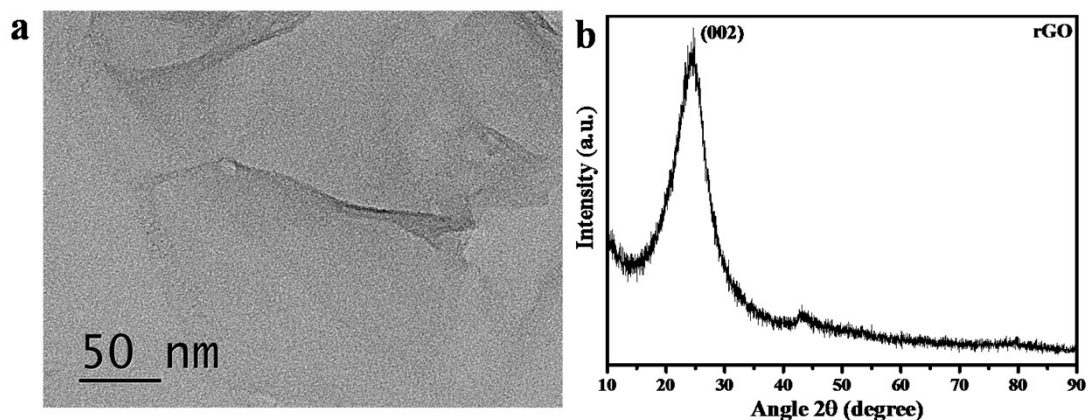

**Figure S1.** The TEM image (a) and XRD pattern (b) of prepared rGO.

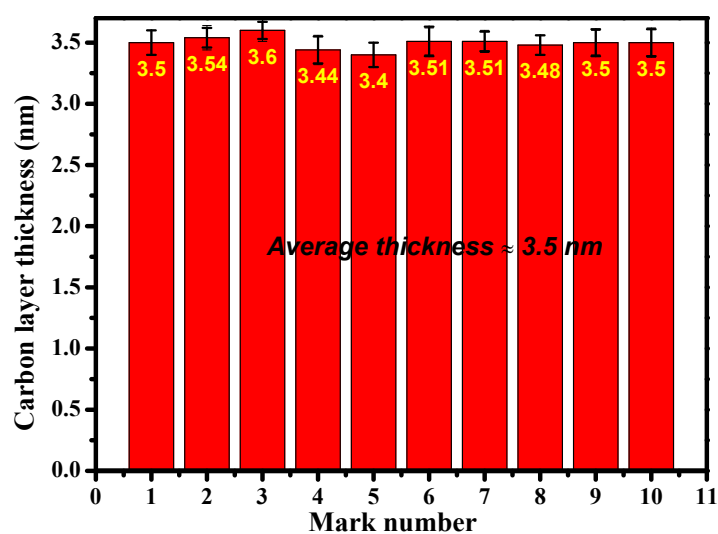

**Figure S2.** Carbon layer thickness statistics result. (Ten of the randomized nanospheres, each sphere with five measurement pots)

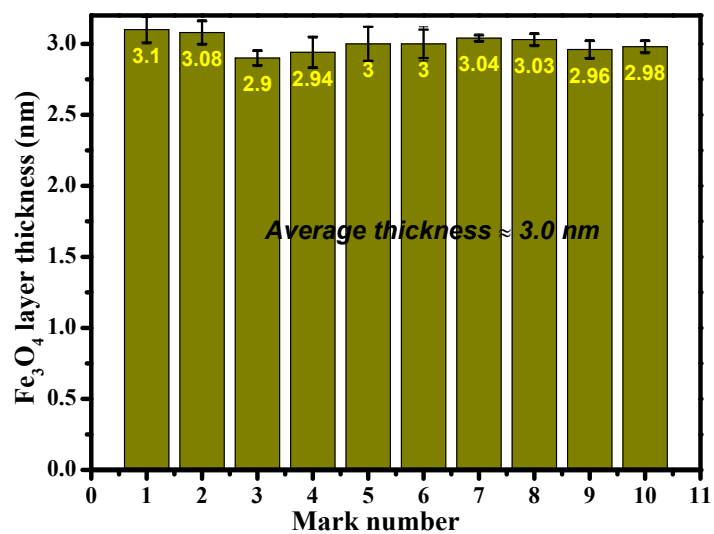

**Figure S3.** Fe<sub>3</sub>O<sub>4</sub> layer thickness statistics result. (Ten of the randomized nanospheres,

each sphere with five measurement pots)

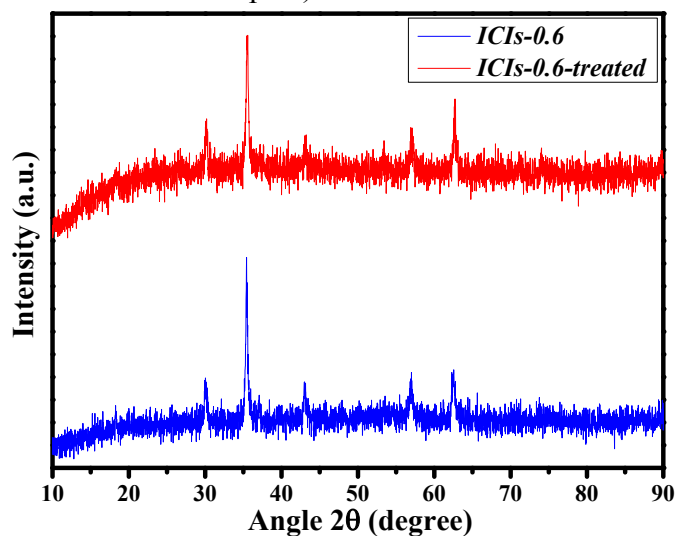

**Figure S4.** XRD patterns of ICIs-0.6 and ICIs-0.6 treated at 50 °C in air for 48 h.

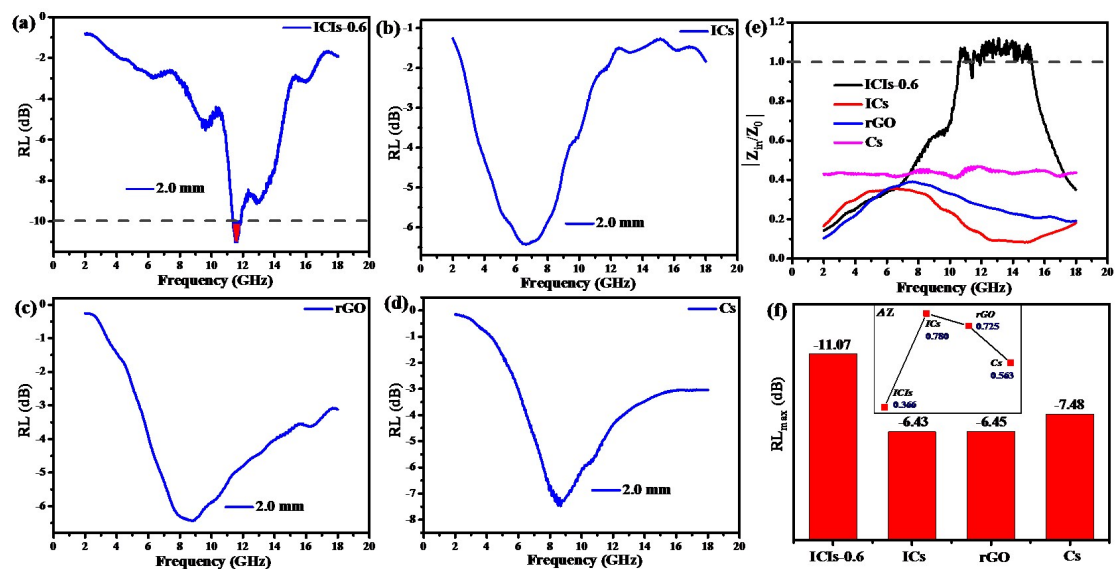

**Figure S5.** The calculated reflection loss of paraffin composites at 2.0 mm; (a) ICIs-0.6, (b) ICs, (c) rGO, (d) Cs. The modulus of normalized input impedance  $|Z_{in}/Z_0|$  (e) and the maximum RL values (f) for ICIs-0.6, ICs, rGO and Cs at 2.0 mm. Inset shows the proposed ACIM value ( $\Delta Z$ ) of the four samples.

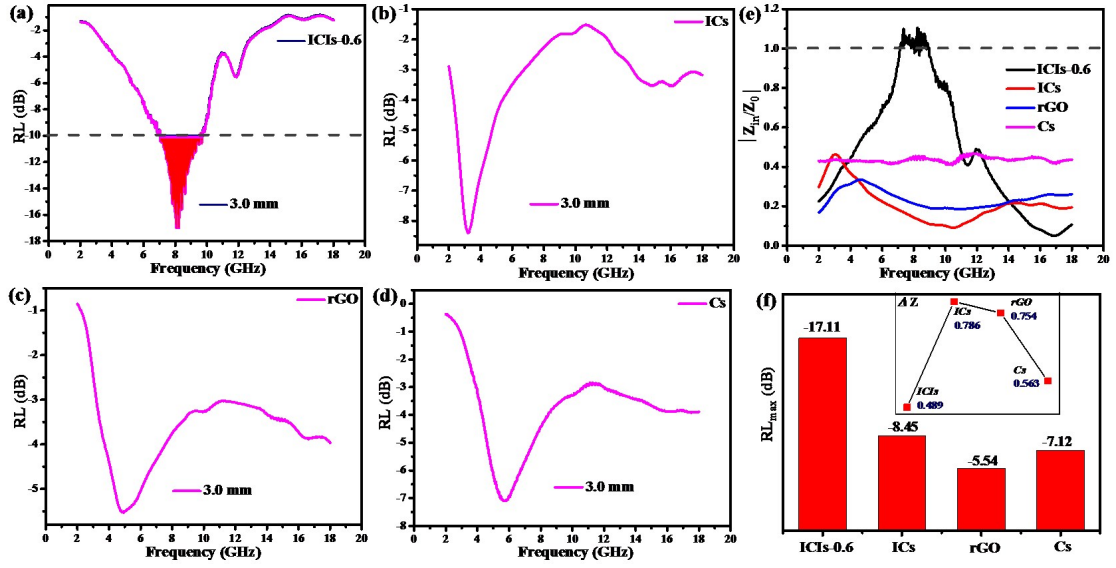

**Figure S6.** The calculated reflection loss of paraffin composites at 3.0 mm; (a) ICIs-0.6, (b) ICs, (c) rGO, (d) Cs. The modulus of normalized input impedance  $|Z_{in}/Z_0|$  (e) and the maximum RL values (f) for ICIs-0.6, ICs, rGO and Cs at 3.0 mm. Inset shows the proposed ACIM value ( $\Delta Z$ ) of the four samples.

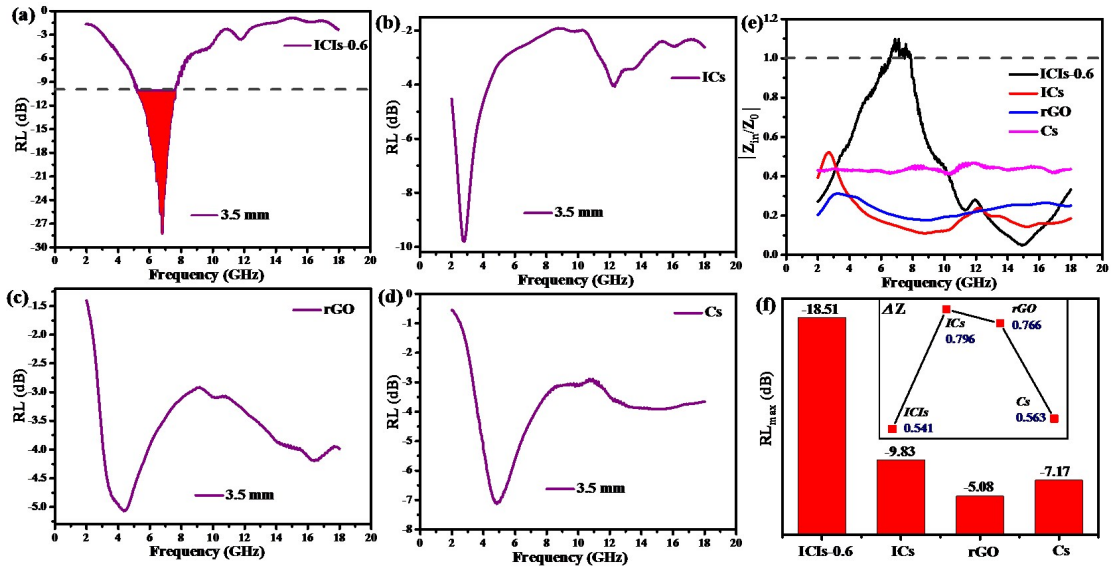

**Figure S7.** The calculated reflection loss of paraffin composites at 3.5 mm; (a) ICIs-0.6, (b) ICs, (c) rGO, (d) Cs. The modulus of normalized input impedance  $|Z_{in}/Z_0|$  (e) and the maximum RL values (f) for ICIs-0.6, ICs, rGO and Cs at 3.5 mm. Inset shows the proposed ACIM value ( $\Delta Z$ ) of the four samples.

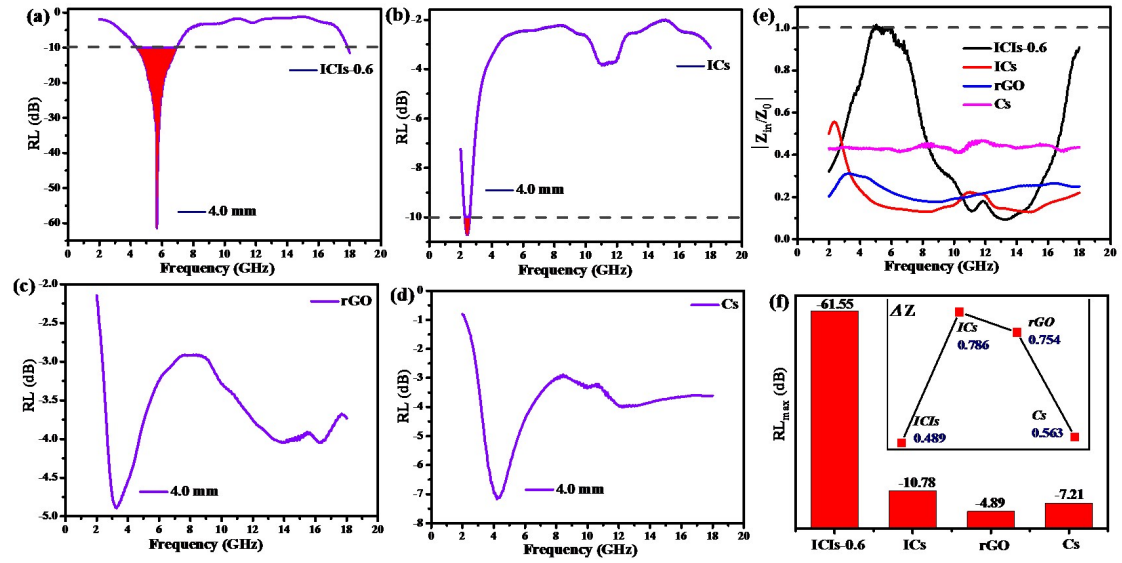

**Figure S8.** The calculated reflection loss of paraffin composites at 4.0 mm; (a) ICIs-0.6, (b) ICs, (c) rGO, (d) Cs. The modulus of normalized input impedance  $|Z_{in}/Z_0|$  (e) and the maximum RL values (f) for ICIs-0.6, ICs, rGO and Cs at 4.0 mm. Inset shows the proposed ACIM value ( $\angle Z$ ) of the four samples.

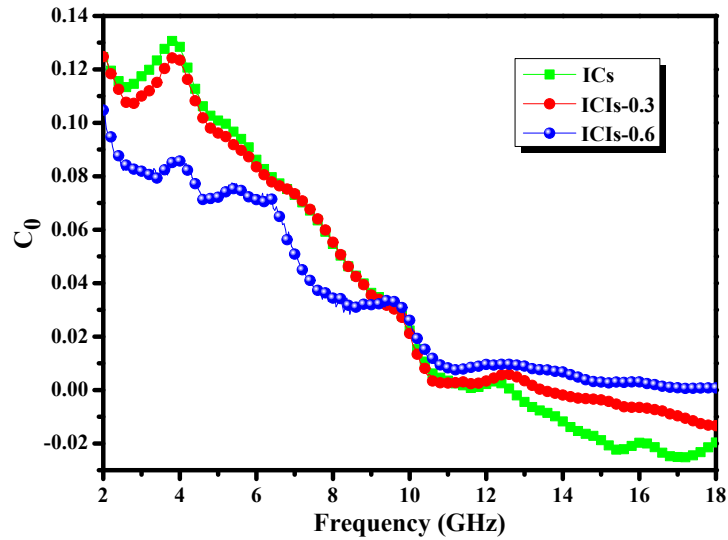

**Figure S9.** Eddy current loss of ICs, ICIs-0.3 and ICIs-0.6.
